# Supplementary material
Source: publisher figshare collection journal article supplement (https://frontiersin.figshare.com/ndownloader/files/24100652)
Supplement: Supplementary file 1 [file 24100652]

# Appendix C

Table C.1

*BIC values of model candidates for final operationalization.*

| **Dilemmas used** | **Model settings** | | **AIC / BIC**  **Standard 1** | **AIC / BIC**  **Standard 2** | **AIC / BIC**  **Standard 3** | **AIC / BIC**  **Standard 4** |
| --- | --- | --- | --- | --- | --- | --- |
| 2 | Classes  Variances  Covariances | 3  Equal  Fixed to 0 | 415.004 / 445.404 | 393.827 / 424.227* | 291.786 / 315.430* | 433.053 / 436.452* |
| Classes  Variances  Covariances | 3  Equal  Equal | 415.192 / 455.725 | 403.560 / 444.093 | 289.884 / 318.595 | 438.618 / 479.151 |
| Classes  Variances  Covariances | 4  Equal  Fixed to 0 | 361.217 / 400.061* | 394.559 / 433.403 | 287.896 / 318.295 | 450.158 / 489.002 |
| Classes  Variances  Covariances | 4  Equal  Equal | 420.511 / 469.489 | 381.492 / 430.469 | 282.886 / 318.352* | 455.645 / 504.622 |
| 2 – 3 | Classes  Variances  Covariances | 3  Equal  Fixed to 0 | 419.343 / 449.743* | 413.412 / 443.811 | 310.277 / 333.921 | 444.440 / 474.840* |
| Classes  Variances  Covariances | 3  Equal  Equal | 424.242 / 464.775 | 391.635 / 432.168 | 307.776 / 336.487 | 450.795 / 491.328 |
| Classes  Variances  Covariances | 4  Equal  Fixed to 0 | 427.537 / 466.382 | 373.965 / 412.809* | 304.699 / 335.099* | 449.200 / 488.044 |
| Classes  Variances  Covariances | 4  Equal  Equal | 423.332 / 472.309 | 394.137 / 443.114 | 317.194 / 352.661 | 456.801 / 505.779 |
| 2 – 4 | Classes  Variances  Covariances | 3  Equal  Fixed to 0 | 421.971 / 452.371 | 363.533 / 393.933* | 287.820 / 311.464 | 440.951 / 471.351* |
| Classes  Variances  Covariances | 3  Equal  Equal | 416.991 / 457.524 | 405.429 / 445.962 | 339.994 / 368.705 | 437.070 / 477.603 |
| Classes  Variances  Covariances | 4  Equal  Fixed to 0 | 366.346 / 405.191* | 372.188 / 411.032 | 278.156 / 308.555* | 446.696 / 485.540 |
| Classes  Variances  Covariances | 4  Equal  Equal | 376.211 / 425.188 | 370.155 / 419.132 | 294.057 / 329.523 | 434.292 / 483.269 |
| 2 – 5 | Classes  Variances  Covariances | 3  Equal  Fixed to 0 | 397.808 / 428.208 | 387.968 / 418.368 | 281.551 / 305.195 | 438.322 / 468.722* |
| Classes  Variances  Covariances | 3  Equal  Equal | 399.220 / 439.753 | 354.468 / 395.001* | 282.986 / 311.697 | 437.355 / 477.888 |
| Classes  Variances  Covariances | 4  Equal  Fixed to 0 | 326.660 / 365.505* | 386.617 / 425.462 | 275.139 / 305.539* | 435.568 / 474.412 |
| Classes  Variances  Covariances | 4  Equal  Equal | 334.047 / 383.025 | 351.449 / 400.427 | 278.359 / 313.826 | 437.031 / 486.008 |
| 2 – 6 | Classes  Variances  Covariances | 3  Equal  Fixed to 0 | 418.959 / 449.359 | 385.003 / 415.403 | 308.863 / 332.507 | 428.969 / 459.368* |
| Classes  Variances  Covariances | 3  Equal  Equal | 425.632 / 466.165 | 344.604 / 385.137* | 332.206 / 360.917 | 422.359 / 462.892 |
| Classes  Variances  Covariances | 4  Equal  Fixed to 0 | 392.147 / 430.991* | 389.546 / 428.390 | 296.491 / 326.891* | 434.808 / 473.652 |
| Classes  Variances  Covariances | 4  Equal  Equal | 397.632 / 446.609 | 357.533 / 406.511 | 299.259 / 334.725 | 419.755 / 468.733 |
| 2 – 7 | Classes  Variances  Covariances | 3  Equal  Fixed to 0 | 421.762 / 452.162* | 371.279 / 401.679 | 297.858 / 321.503 | 425.062 / 455.462 |
| Classes  Variances  Covariances | 3  Equal  Equal | 420.101 / 460.634 | 375.294 / 415.827 | 321.101 / 349.812 | 400.585 / 441.118* |
| Classes  Variances  Covariances | 4  Equal  Fixed to 0 | 422.366 / 461.210 | 359.147 / 397.991 | 280.343 / 310.743* | 413.926 / 452.770 |
| Classes  Variances  Covariances | 4  Equal  Equal | 421.806 / 470.783 | 334.973 / 383.950* | 283.453 / 318.919 | 398.842 / 447.820 |

*Notes.* * model used in subsequent analysis.
